**Noname manuscript No.**  
(will be inserted by the editor)

---

## **A Bayesian sequential learning framework to parameterise continuum models of melanoma invasion into human skin**

**Alexander P Browning · Parvathi Haridas ·  
Matthew J Simpson**

Received: date / Accepted: date

**Abstract** We present a novel framework to parameterise a mathematical model of cell invasion that describes how a population of melanoma cells invades into human skin tissue. Using simple experimental data extracted from complex experimental images, we estimate three model parameters: (i) the melanoma cell proliferation rate,  $\lambda$ ; (ii) the melanoma cell diffusivity,  $D$ ; and (iii)  $\delta$ , a constant that determines the rate that melanoma cells degrade the skin tissue. The Bayesian sequential learning framework involves a sequence of increasingly-sophisticated experimental data from: (i) a spatially uniform cell proliferation assay; (ii) a two-dimensional circular barrier assay; and, (iii) a three-dimensional invasion assay. The Bayesian sequential learning approach leads to well-defined parameter estimates. In contrast, taking a naive approach that attempts to estimate all parameters from a single set of images from the same experiment fails to produce meaningful results. Overall our approach to inference is simple-to-implement, computationally efficient, and well-suited for many cell biology phenomena that can be described by low dimensional continuum models using ordinary differential equations and partial differential equations. We anticipate that this Bayesian sequential learning framework will be relevant in other biological contexts where it is challenging to extract detailed, quantitative biological measurements from experimental images and so we must rely on using relatively simple measurements from complex images.

**Keywords** Cell invasion · Melanoma · Invasion assay · Cancer · Bayesian inference

---

Alexander P Browning  
School of Mathematical Sciences, Queensland University of Technology (QUT), Brisbane, Australia

Parvathi Haridas  
Institute of Health and Biomedical Innovation, QUT, Kelvin Grove, Australia

Matthew J Simpson  
School of Mathematical Sciences, Queensland University of Technology (QUT), Brisbane, Australia  
E-mail: [matthew.simpson@qut.edu.au](mailto:matthew.simpson@qut.edu.au)

## 1 Introduction

Mathematical models of cell invasion may be expressed as coupled systems of partial differential equations where one component describes the density of invading cells, and another component describes the density of the receding tissues (Perumpanani et al., 1999; Gatenby et al., 1996; Landman et al., 1998; Smallbone et al., 2005; Anderson et al., 2008; Fasano et al., 2009; Swanson et al., 2011; Massey et al., 2012). Typically, models of cell invasion involve a population of motile, proliferative cells that release chemical signals to locally degrade surrounding tissues. These models have been applied to study malignant invasion (Gatenby et al., 1996) and developmental processes (Landman et al., 1998). While mathematical analysis of these models is relatively well established (e.g. Perumpanani et al., 1999), there are no standardised statistical protocols to parameterise these models using data from experimental images.

We consider the invasion of a population of metastatic melanoma cells into human skin tissue. Experimental images show that melanoma cells simultaneously migrate, proliferate and degrade the skin (Haridas et al., 2017b). To parameterise a parsimonious model of cell invasion we aim to infer three parameters: (i) the melanoma cell proliferation rate,  $\lambda > 0$  [h]; (ii) the melanoma cell diffusivity,  $D > 0$  [ $\mu\text{m}^2/\text{h}$ ]; and (iii) the rate at which melanoma cells degrade the tissue,  $\delta > 0$  [h]. We take a likelihood-based Bayesian approach and work with a sequence of increasingly sophisticated experiments to identify these parameters. A key outcome is to show that we obtain meaningful parameter estimates by working with relatively simple measurements from experimental images from sequence of increasingly-sophisticated experiments. In fact, we also show that naively attempting to identify  $D$ ,  $\lambda$  and  $\delta$  using only data from the most sophisticated, invasion experiment, leads to poorly-defined posterior distributions.

---

## 2 Experimental methods

All experiments use the SK-MEL-28 metastatic human melanoma cell line (Carey et al., 1976). All experimental data are summarised in the Supporting Material.

### 2.1 Type 1: Proliferation assay

A proliferation assay involves uniformly placing a population of cells, at low density, on a two-dimensional substrate. Cells migrate and proliferate, and the density of the monolayer increases (Browning et al., 2017). On average, proliferation assays are translationally invariant since the population of cells is distributed uniformly. Therefore, we simply count the number of cells in the field of view to characterise the increase in population density over time. We use images and data from Haridas et al. (2017a). The population growth is quantified by counting the number of cells in several regions, and dividing by the area of the region and the carrying capacity density,  $K = 2.8 \times 10^{-3}$  cells/ $\mu\text{m}^2$  (Haridas et al., 2017a), to give an estimate of the nondimensional cell density at  $t = 0, 24$  and  $48$  h. We consider three identically-prepared experimental replicates (Haridas et al., 2017a), and 26 subregions per replicate to give 78 nondimensional density estimates per time point. Images in Figure 1a-c show the growth process, and data in Figure 1d summarises the data.

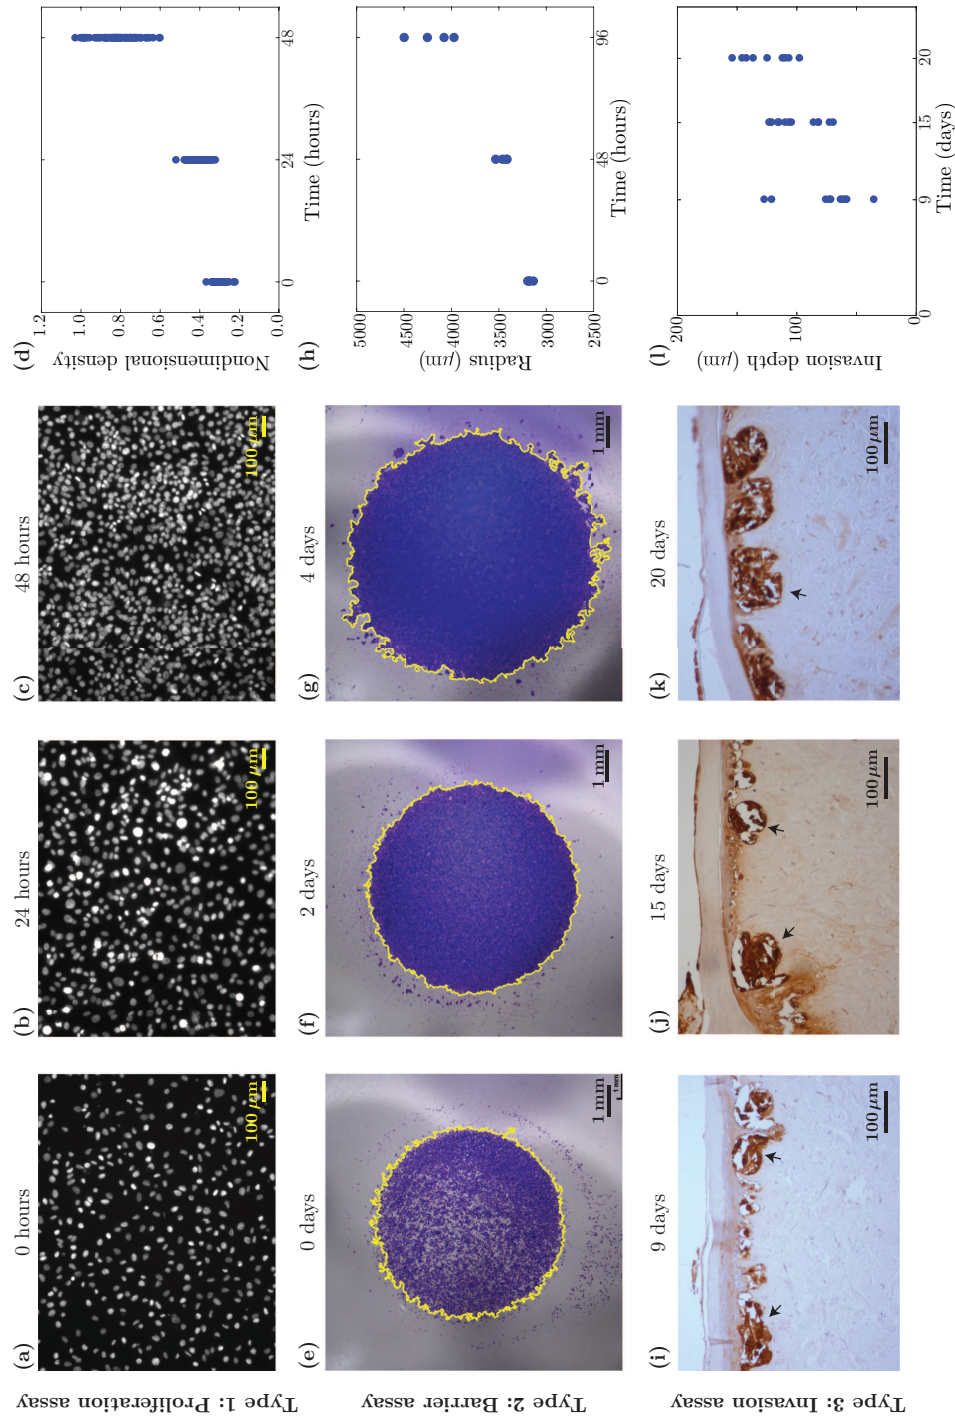

**Fig. 1 Experimental images and data summary.** (a)-(c) Typical images from the proliferation assay with SK-MEL-28 cells. The nondimensional density increases with time, as summarised in (d). (e)-(g) Typical images from the circular barrier assay with SK-MEL-28 cells, with data in (h) showing the increase in radius of the spreading circular population. (i)-(k) Typical images from the invasion assay with SK-MEL-28 cells, with data in (l) showing the increase in depth of invasion. Images in (a)-(c) are reproduced from Haridas et al. (2017a); images in (e)-(g) are reproduced from Haridas et al. (2018); and images in (i)-(k) are reproduced from Haridas et al. (2017b). The differences in colour and appearance between the experimental images are due to differences in staining techniques between the three different types of experiments.

## 2.2 Type 2: Barrier assay

A circular barrier assay is initiated by uniformly placing a population of cells inside a circular barrier (Treloar et al., 2013a). The barrier is lifted and the population of cells spreads outwards across a two-dimensional surface. Figure 1e shows that the initial population of 20,000 melanoma cells is confined to a circular region with a diameter of approximately 6 mm. This means that the initial density of the monolayer inside the barrier is  $20,000/(\pi 3000^2) \approx 7.07 \times 10^{-3}$  cells/ $\mu\text{m}^2$ , corresponding to an initial nondimensional density of  $20,000/(K\pi 3000^2)$ , giving approximately 0.25. Over four days the population spreads to occupy a circular region with a diameter of approximately 9 mm (Haridas et al., 2018). The key difference between the circular barrier assay and the proliferation assay is that the proliferation assay is translationally invariant whereas the barrier assay is not, as the barrier assay involves moving fronts of cells. Therefore, the proliferation assay is well-suited for estimating the cell proliferation rate, and the circular barrier assay is well-suited for estimating the cell diffusivity.

Automated image processing, implemented in MATLAB (Mathworks, 2018a), is used to quantify the spreading of the cell population by estimating the position of the leading edge. This involves applying steps 1-7 from Algorithm 1, which are shown in Figure 2a-f (Treloar et al., 2013b). Following this initial process, we obtain a mean pixel density profile as a function of the radius using the procedure outlined in steps 8-14 of Algorithm 1. This second series of steps are outlined visually in Figure 2g-h. To summarise each experimental image, we first consider that the scaled mean pixel density at the centre of the assay is unity. We then estimate the position of the leading edge of the spreading population to be the radius at which the scaled mean pixel density of 1% of the initial maximum pixel density. This allows us to estimate the position of the leading edge of the spreading population where the density is approximately 1% of the maximum initial density. The threshold of 1% has been

shown, in previous studies, to give a reliable measure of the extent of spatial spreading (Treloar et al., 2013b). This process is repeated for four identically-prepared barrier assays, at each time step, and the data is summarised in Figure 1h.

---

**Algorithm 1** Quantifying experimental images from a circular barrier assay using the image processing toolbox in MATLAB (Mathworks, 2018a).

---

- 1: Load and crop image using `imread()`.
  - 2: Convert image to grayscale using `rgb2gray()`.
  - 3: Obtain the gradient mask using the Sobel method, `edge(·, 'Sobel',  $\gamma$ thresh)`, where `thresh` is the MATLAB suggested threshold, and  $\gamma$  is an adjustment parameter. We initially fix  $\gamma = 1$  for each image, and adjust as necessary.
  - 4: Obtain dilated binary mask using `imdilate` and `strel` with a 'disk' structuring element.
  - 5: Fill holes in the mask using `imfill(·, 'holes')`.
  - 6: Smooth the mask using `imerode` and `strel` using a 'disk' shaped structuring element.
  - 7: Clear border objects using `imclearborder` and remove small areas using `bwareaopen`.
  - 8: Use `regionprops(·, 'centroid')` to obtain the coordinates of the centre of the area.
  - 9: Determine the distance of each pixel in the region from the calculated centre.
  - 10: Use `histogram()` to obtain the distribution of distances using  $\Delta r = 5 \mu\text{m}$ .
  - 11: Scale by the area of each 'bin',  $\pi(r_1^2 - r_0^2)$ , where  $r_0$  and  $r_1$  are the radius edges of each bin.
  - 12: Scale using the length scale of each image to determine the density profile.
  - 13: Smooth so that the density at small radii is 1.
  - 14: Obtain the profile at all distances as required using `interp1()` and the 'spline' method.
-

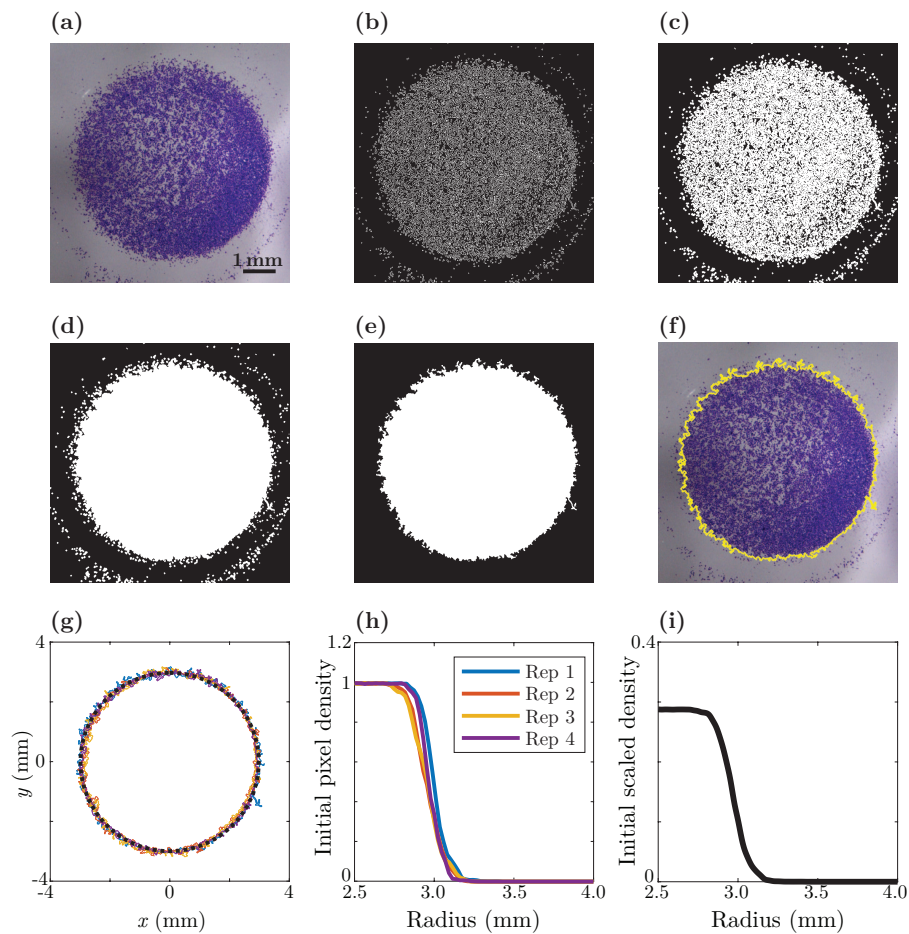

**Fig. 2 Automated image processing for the circular barrier assay.** (a)-(f) Stages in the automatic leading edge detection algorithm: (a) original image; (b) grayscale gradient mask; (c) dilated binary mask; (d) binary image with holes filled; (e) clear binary image; (f) original image with detected leading edge superimposed, showing a good match. (g)-(i) Stages in determining the location of the leading edge using several identically-prepared images: (g) leading edge for each experimental replicate at  $t = 0$  h, with the centre corresponding to the centre of mass of each region; (h) average pixel density profile as a function of radius,  $r$ , for each experimental replicate; (i) average pixel density, scaled relative to the initial density of 20,000 cells within a circle of diameter 6 mm, to represent the scaled pixel density as a function of  $r$ .



### 2.3 Type 3: Invasion assay

The invasion assay involves observing how a monolayer of melanoma cells invade into human de-epidermised dermis prepared from discarded human skin tissue, as described by Haridas et al. (2017b). Primary skin cells are used in the invasion assay to ensure the formation of a stratified epidermis with a basement membrane (Haridas et al., 2017b). Vertical invasion of melanoma cells, downward through the basement membrane into the dermis, is observed. The depth of invasion beyond the basement membrane is estimated using immunohistochemistry. Measurements quantify the depth of invasion into the dermis after 9, 15 and 20 days, thereby providing temporal information about the invasion process. A summary of images in Figure 1i-j show melanoma cells invading into the skin tissue. Here we see that the invasion of the population of melanoma cells is closely associated with the receding skin tissues. These experiments are summarised by measuring the distance between the deepest melanoma cells and the boundary between the epidermis and the dermis (Haridas et al., 2017b).

The depth of invasion over 20 days is approximately  $150\ \mu\text{m}$  and the initial width of the monolayer of melanoma cells on the top of the skin is approximately 6 mm. Since the depth of invasion is measured under the centreline of the monolayer, and the depth of invasion is very small relative to the horizontal extent of the initial population,  $150/6000 = 0.025 \ll 1$ , we characterise the invasion as a function of time and vertical depth only. Nine identically prepared invasion experiments are performed for each time point, and the invasion depth data is presented in Figure 11.

### 3 Mathematical models

A detailed discussion about the development of the mathematical models, the key assumptions underlying these models, and their nondimensionalisation, is given in the Supporting Material. In brief, we use a sequence of related models that we present



here in order of increasing sophistication. In all cases, we choose nondimensionalise the dependent variables, but work with dimensional independent variables and dimensional parameters.

### 3.1 Model 1: Temporal one-component model for the proliferation assay

For a spatially uniform population of melanoma cells in the absence of skin tissue, we make the standard assumption that the population grows logistically (Sengers et al., 2007; Maini et al., 2004; Swanson et al., 2011).

$$\frac{dC(t)}{dt} = \lambda C(t) [1 - C(t)], \quad (1)$$

so that

$$C(t) = \frac{C(0)}{C(0) + e^{-\lambda t}(1 - C(0))}, \quad (2)$$

where  $C(t)$  is the nondimensional density of the monolayer at time  $t$ .

### 3.2 Model 2: Spatial and temporal one-component model for the barrier assay

We assume that a population of motile and proliferative melanoma cells spreads according to the Fisher-Kolmogorov model (Sengers et al., 2007; Maini et al., 2004; Swanson et al., 2011), provided that there is no skin tissue present. Written in radial coordinates, we have

$$\frac{\partial C(r,t)}{\partial t} = \frac{D}{r} \frac{\partial}{\partial r} \left[ r \frac{\partial C(r,t)}{\partial r} \right] + \lambda C(r,t) [1 - C(r,t)], \quad (3)$$

where  $r > 0$  is the radial position.

### 3.3 Model 3: Spatial and temporal two-component model for the invasion assay

The full mathematical model of the invasion assay is given by,

$$\frac{\partial C(x,t)}{\partial t} = D \frac{\partial}{\partial x} \left[ (1 - S(x,t)) \frac{\partial C(x,t)}{\partial x} \right] + \lambda C(x,t) [1 - C(x,t) - S(x,t)], \quad (4)$$

$$\frac{\partial S(x,t)}{\partial t} = -\delta C(x,t)S(x,t), \quad (5)$$

where  $C(x,t)$  is the nondimensional density of melanoma cells,  $S(x,t)$  is the nondimensional density of skin tissue and  $x$  is the vertical depth into the tissue. In brief, the movement of the melanoma cells is governed by a nonlinear diffusion term where the nonlinear diffusivity is a decreasing function of the skin density so that melanoma cells are unable to diffuse when the skin is at maximum density. The proliferation of melanoma cells is logistic, and crowding effects are incorporated so that when the total density of skin and melanoma cells are at maximum density the net proliferation rate is zero. The skin tissues degrade when in contact with melanoma cells. Other choices for the form of the nonlinear diffusivity function and the sigmoid proliferation model are possible, and we briefly discuss these options in the Conclusions.

The three models that we consider are closely related. To see this, setting  $S(x,t) = 0$  in Equation (4) leads to the Fisher-Kolmogorov equation which, when written in radial coordinates, gives Equation (3). Similarly, setting  $S(x,t) = 0$  and  $\partial C(x,t)/\partial x = 0$  in Equation (4) leads to Equation (1). The methods used to solve Equations (3)–(4) are outlined in the Supporting Material.

### 3.4 Initial conditions

For each model we specify an initial condition to match the initial experimental measurements.

**Model 1.**  $C(0)$  is the average nondimensional density measured at  $t = 0$ .

**Model 2.** Algorithm 1 gives the scaled pixel density profile as a function of  $r$ , for images at  $t = 0$ . With this information we compute the average the density profile across all experimental replicates, and re-scale so that the nondimensional density at the centre of the circular population corresponds to placing 20,000 cells of diameter  $20 \mu\text{m}$  into a circular barrier of radius  $3000 \mu\text{m}$ .

**Model 3.** The invasion into the dermis commences approximately 4 days after the invasion assay is initialised (Haridas et al., 2017b). To capture this we assume the density of a monolayer of melanoma cells initially placed onto the surface of the skin tissue grows logistically over the first 4 days, giving the initial nondimensional density of melanoma cells at the top of the tissue to be approximately 0.78. To model the spatial aspects of the invasion assay, we assume the monolayer of melanoma cells is  $20 \mu\text{m}$  thick (Haridas et al., 2017a), giving  $C(x, 0) = 0.78$  for  $-20 < x < 0$ , and  $C(x, 0) = 0$  for  $x > 0$ . We assume that the density of skin tissue is the maximum possible density,  $S(x, 0) = 0$  for  $-20 < x < 0$ , and  $S(x, 0) = 1$  for  $x > 0$ .

### 3.5 Summarising model observations

To connect the models with the experimental measurements, we summarise key features the model solutions that can be matched with simple, objective measurements from the experimental images. Our aim is to estimate  $\Theta = \langle \lambda, D, \delta \rangle$ . Throughout we denote  $M_k(t; \Theta)$  as a summarised model observation from model  $k$ , at time  $t$ . Here,  $k = 1, 2$  or  $3$ . For each model we summarise the observation as follows:

**Model 1.** The density:

$$M_1(t; \Theta) = C(t).$$

**Model 2.** The radius of the leading edge:

$$M_2(t; \Theta) = \{r : C(r, t) = 0.01C(0, t)\}.$$

**Model 3.** The depth of the front of melanoma cells:

$$M_3(t; \Theta) = \min\{x : C(x, t) = 0\}.$$

These data, which summarise the predictions of the model, are chosen because they are objective, simple measurements that can be obtained from experimental images.

#### 4 Statistical inference

Taking a Bayesian approach we consider both the model parameters,  $\Theta$ , and experimental observations to be random variables (Gelman et al., 2004; Toni et al., 2009; Fearnhead et al., 2012; Collis et al., 2017; Browning et al., 2018). We consider that the deterministic models capture the *expected* behaviour, and that the experimental data in Figure 1d,h,l characterises some measurable experimental variability (Warne et al., 2017). Therefore, we make the natural assumption that the experimental observations are normally distributed about the solution of the corresponding model (Collis et al., 2017; Warne et al., 2017), and we assume the observation variance within each experiment is a constant, which we denote  $\Sigma_k^2$ .

Before we make any experimental observations, our knowledge about the parameters is contained within the prior distribution,  $p(\Theta)$ . We denote a sequence of experimental observations  $\mathbf{X}_k = \{y_i, t_i\}_{i=1}^{n_k}$ , where  $y_i$  is an experimental observation from model  $k$  at time  $t_i$  and  $n_k$  is the number of times that experimental data is recorded for experiment type  $k$ . We may therefore express the likelihood,  $\mathcal{L}_k(\mathbf{X}_k | \Theta)$ , or probability density of the experimental data given the model parameters as

$$\mathcal{L}_k(\mathbf{X}_k | \Theta) = \prod_{i=1}^{n_k} \phi(y_i; M_k(t_i; \Theta), \Sigma_k^2), \quad (6)$$

where  $M_k(t_i; \Theta)$  is a summary model observation at time  $t_i$  from model  $k$ , and  $\phi$  denotes a normal probability density with mean  $M_k(t_i; \Theta)$  and variance  $\Sigma_k^2$ . We ap-

proximate  $\Sigma_k^2 \approx s_k^2$ , where  $s_k^2$  is a pooled sample variance of the time-grouped observations for each experimental data set. That is, we calculate the variance of the pooled sample for each experiment, after the mean of each time group has been subtracted. Specifically,

$$s_k^2 = \frac{1}{n_k - 1} \sum_{i=1}^{n_k} (y_i - \mu(t_i))^2, \{y_i, t_i\} \in \mathbf{X}_k, \quad (7)$$

where  $\mu(t_i)$  is the mean of the set of experimental observations made at time  $t_i$ . This assumption allows for a different mean between each group of data at different time points.

Using Bayes' theorem, we update our knowledge of the parameters to form a posterior distribution,

$$p(\Theta | \mathbf{X}_k) \propto \underbrace{p(\Theta)}_{\text{prior}} \underbrace{\prod_{i=1}^n \phi(y_i; M_k(t_i; \Theta), \Sigma_k^2)}_{\text{likelihood}}. \quad (8)$$

A key element of this study is to contrast how a posterior distribution using a uniform prior differs from an *informed* prior that are built sequentially. We consider a uniformly distributed prior defined over a sufficiently large parameter space so that all biologically feasible parameter combinations are covered. We do not specify the domain of the prior, and we use the scaled posterior distribution to obtain information such as maximum likelihood estimates.

When forming posterior distributions using *informed* prior distributions,  $p_k(\Theta | \mathbf{X}_k)$ , we use a sequential approach. That is, we specify the prior distribution for model  $k$  to be the posterior distribution for model  $k - 1$ ,

$$\underbrace{p_k(\Theta | \mathbf{X}_k)}_{\text{posterior for model } k} \propto \underbrace{p_{k-1}(\Theta | \mathbf{X}_{k-1})}_{\text{posterior for model } k-1} \prod_{j=1}^n \phi(y_j; M_k(t_j; \Theta), \Sigma_k^2), k = 2, 3. \quad (9)$$

Mathematically, the posterior distribution formed for model  $k$  using this technique is equivalent to the posterior distribution given data up to experiment type  $k$ . That is,

$$p_k(\Theta|\mathbf{X}_k) = p(\Theta|\{\mathbf{X}_i\}_{i=1}^k) \propto p(\Theta) \prod_{i=1}^k \prod_{j=1}^{n_k} \phi(y_j; M_i(t_j; \Theta), \Sigma_i^2). \quad (10)$$

In practise it is simpler to apply Equation (9) to form these posterior distributions rather than Equation (10). For example, Model 1 only depends on  $\lambda$ , a single element of  $\Theta$ . Therefore, the other components of the posterior distribution,  $D$  and  $\delta$ , remain uniform when we work with Equation (9) for model 1. It is relatively straightforward to find the posterior support for a single parameter rather than finding the posterior support for multiple parameters simultaneously. As more parameters are incorporated in successive models, in this case one at-a-time, the search for the posterior support remains a simple task. In contrast, and we as will demonstrate, it is both practically challenging and computationally inefficient to find the posterior support for Model 3 directly, since it depends on all three components of  $\Theta$ . As a result, our sequential approach allows us to estimate a three-dimensional posterior distribution easily and efficiently, whereas the direct approach fails to produce meaningful results.

When presenting posterior distributions, we calculate the posterior distribution exactly at points on a relatively coarse square discretisation of the parameter space (Supporting Material). Our choice of discretisation allows us to calculate maximum likelihood estimates accurately to two significant figures, without further refinement. We then use a spline interpolation (Mathworks, 2018b) to both enhance the resolution of the posterior distributions and to approximate the posterior density at points that do not lie on the square discretisation, as required.

#### 4.1 Credible regions

To summarise the posterior distributions we compute and show credible regions. We first calculate the total scaled posterior distribution volume,  $I = \int_{\mathbb{R}^3} p(\Theta|\mathbf{X})d\Theta$ , us-

ing quadrature, on the smoothed posterior distribution. In this work we use the rectangle rule to approximate the integrals. This procedure is relevant for the informed sequential posterior distributions since it is visually obvious that we have covered the support of the distribution. In contrast, this approach is not possible for the posterior distributions that use a uniform prior, since we have not calculated the posterior density through the entire support.

Figure 3a-b illustrates how we calculate the credible region  $Q$ , bounded by  $q$ , for one- and two-dimensional posterior distributions. The  $1 - \alpha$  credible region of  $p(\Theta|\mathbf{X})$  is

$$Q : \int_Q p(\Theta|\mathbf{X})d\Theta = (1 - \alpha)I, \quad \text{and} \quad p(\Theta|\mathbf{X}) = p_{\text{crit}} \forall \Theta \in q, \quad (11)$$

for  $\alpha \in [0, 1]$ . This means that the total posterior density within  $Q$  is  $1 - \alpha$ , with constant posterior density on the boundary,  $p_{\text{crit}}$ . We approximate this region by estimating  $p_{\text{crit}}$  such that

$$\int_{\Theta: p(\Theta|\mathbf{X}) > p_{\text{crit}}} p(\Theta|\mathbf{X})d\Theta = (1 - \alpha)I,$$

where the integral is estimated using quadrature, in this case the rectangle rule. For all results we set  $\alpha = 0.05$  to calculate a 95% credible region.



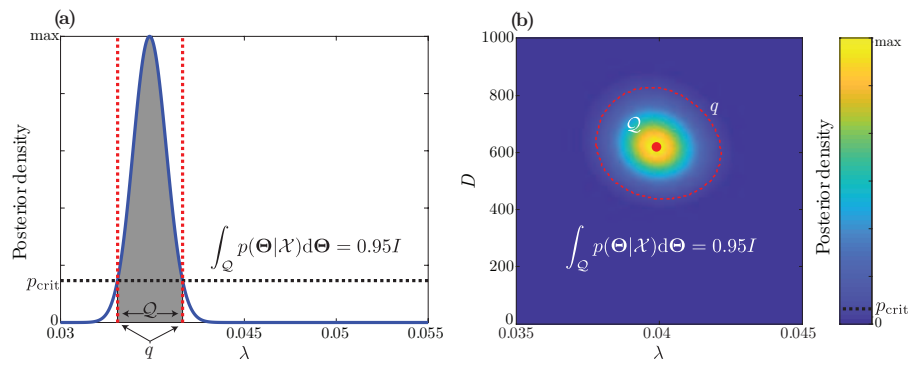

**Fig. 3 Example credible region calculations.** In each case the boundary of the interval or region, denoted  $q$ , has constant posterior density. The total area under in the one-dimensional case, or total volume in the two-dimensional case is  $0.95I$ . Extending the credible region calculation in (b) to deal with higher-dimensional posterior distributions is straightforward. The boundary of the 95% credible region is indicated with a dashed red line.

When calculating a credible region, we increase the accuracy of the reported credible interval by smoothing the probability density function using the `interp` function in MATLAB with a cubic spline interpolation (Mathworks, 2018b). This approach allows us to increase the accuracy of the credible interval estimates further than our relatively coarse discretisation of the parameter space would otherwise allow. The details of the discretisations are given in the Supporting Material document. In the Supporting Material document we show how this processing provides a similar, but visually smoother approximation to credible regions than what would otherwise be possible with the relatively coarse discretisation.

#### 4.2 Prediction intervals

To demonstrate uncertainty in the model predictions, we approximate and present prediction intervals along with a model prediction produced using the mode of the posterior distribution. It should be noted that the borders of the prediction intervals we present are not model realisations. Rather, these intervals correspond to the interval containing 95% of model realisations. Prediction intervals are calculated by sampling 50,000 parameter combinations from the posterior distribution and solving the appropriate model for each combination. We continue our assumption that the model captures a normally-distributed experimental variability by adding Gaussian noise to each model realisation, independently at each time point. For each time point, we use the `ksdensity` function in MATLAB (Mathworks, 2018c) to form a probability density function, from which we follow our previously outlined procedure to approximate a credible interval.

### 5 Results and Discussion

The first step is to estimate  $\lambda$  from Equation (1). Results in Figure 4a show that we arrive at well-defined, approximately symmetric posterior. The posterior mode is

---

0.040 /h and 95% credible interval  $0.038 < \lambda < 0.042$  /h. Our estimate of the mode corresponds to a doubling time of  $\ln(2)/0.04 \approx 17$  h, which is fairly typical for a melanoma cell line (Treloar et al., 2013a). It is also useful to note that the posterior support for  $\lambda$  is relatively narrow. In our preliminary investigations (not shown), we originally explore the interval  $0 < \lambda < 0.2$  /h, but since we find non-zero posterior density for just a small region within this interval we present results in Figure 4a on just  $0.03 < \lambda < 0.05$  /h.

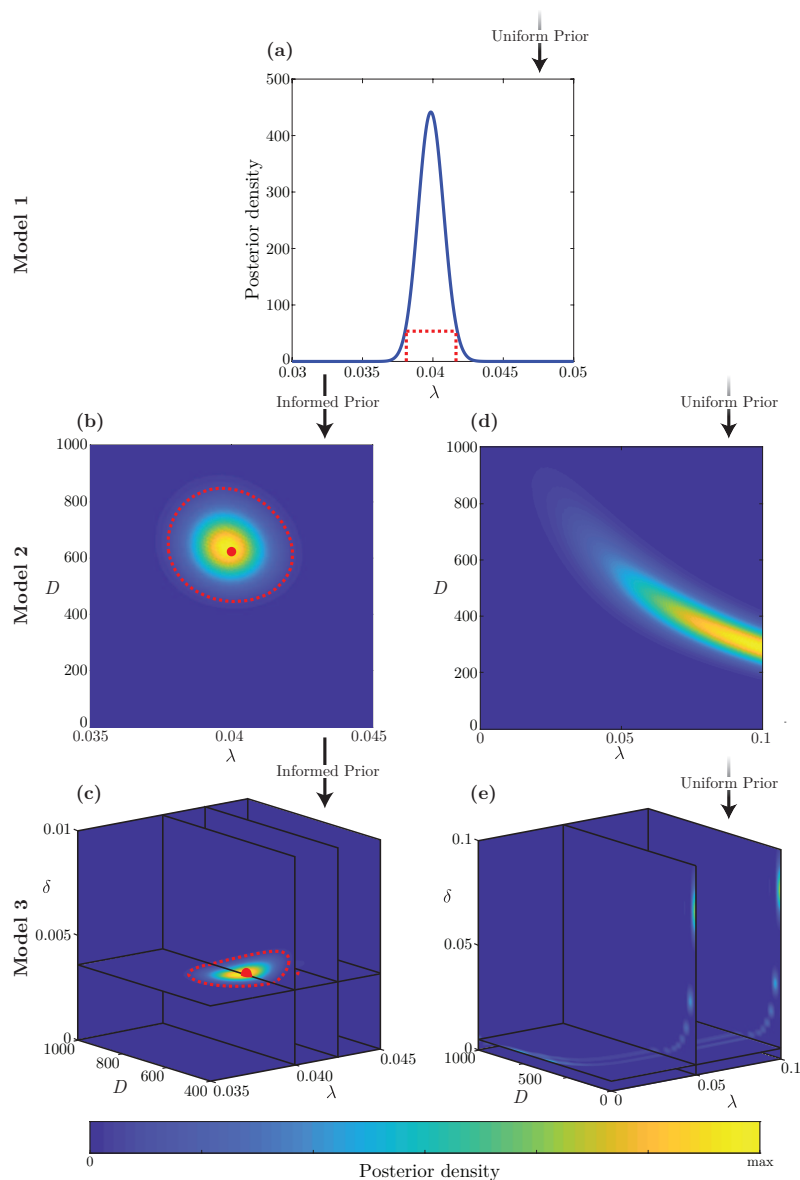

**Fig. 4 Posterior distributions.** Posterior distributions produced for each model and each experiment: (a) model 1; (b),(d) model 2; and, (c), (e) model 3. (a), (d) and (e) Posterior distributions using a prior where each component is uniformly distributed. (b)-(c) Informed posterior distributions for model  $k = 2, 3$ , where the prior is taken to be the posterior distribution from model  $k - 1$ , as indicated by the arrows. Where appropriate, the posterior mode, or maximum likelihood estimate, is indicated with a red circle or sphere, and the boundary of the 95% credible region is indicated with a dashed red line. Modes for each model and univariate 95% credible intervals are given in Table 1. In all cases, the posterior density is scaled so that the maximum posterior density in the region shown is yellow, and blue represents a posterior density of zero.

With this information about  $\lambda$ , we now have two approaches to estimate  $\lambda$  and  $D$  from the circular barrier assay. First, we use the posterior in Figure 4a as a prior for  $\lambda$ , together with a uniform prior for  $D$ . This is the *informed* approach. The bivariate posterior in Figure 4b is well-defined, with little correlation between  $D$  and  $\lambda$ , and a mode of  $D = 620 \mu\text{m}^2/\text{h}$  and  $\lambda = 0.04 /\text{h}$ . Again, these estimates are consistent with previously-reported values (Treloar et al., 2013a), but we note that previous studies have used extremely detailed experimental data that involves using nuclear stains to count individual cells and to construct detailed spatial and temporal distributions of cells within the circular barrier assay (Treloar et al., 2013a; Sengers et al., 2007; Cai et al., 2007). In contrast, here we simply use leading edge detection which completely circumvents the need for counting individual cells to construct detailed spatial and temporal distributions of cells in the barrier assay experiments. This means that our approach is very fast, simple-to-implement, and suitable for automation. In contrast, previous approaches are extremely labour intensive and cannot be easily automated (Treloar et al., 2013a; Sengers et al., 2007; Cai et al., 2007).

In comparison with the informed approach, we now attempt to estimate  $D$  and  $\lambda$  directly with the leading edge data from the barrier assay with uniform priors for both  $D$  and  $\lambda$ . Indicative results in Figure 4d highlight several limitations with this approach. Here we have a very wide, poorly-defined posterior distribution with non-zero posterior density on the boundary of the parameter space. To arrive at this result we gradually widened the  $(D, \lambda)$  support, and it is important to note that the region in Figure 4d, covers  $0 < \lambda < 0.1 /\text{h}$  and  $0 < D < 1000 \mu\text{m}^2/\text{h}$ . Since typical doubling times for cells are always in the range 10-20 h, it is clear that continuing to widen the support in Figure 4d will never lead to biologically-relevant parameter estimates. Therefore, we do not consider any further widening of the support. The reason that this approach fails to produce useful results is that the leading edge data alone is an insufficient summary statistic to identify  $D$  and  $\lambda$  from the barrier assay. Overall, comparing results in Figure 4b and Figure 4d confirm that our sequential

Bayesian learning approach of combining minimal summary statistics from different experiments is both simple-to-implement and promising, as it leads to well-defined posterior distributions with a mode that is close to previously-determined estimates.

We now attempt to estimate  $\lambda$ ,  $D$  and  $\delta$  from the invasion assay. Again, with the *informed* approach, we use the posterior in Figure 4b as a prior for  $\lambda$  and  $D$ , with a uniform prior for  $\delta$ . The posterior distribution in Figure 4c is well-defined, with a mode of  $D = 620 \mu\text{m}^2/\text{h}$ ,  $\lambda = 0.04 /\text{h}$  and  $\delta = 0.0036 /\text{h}$ . As before, these estimates for  $D$  and  $\lambda$  are consistent with previously-reported estimates, but we note that values of  $\delta$  have not been reported previously for this kind of experimental data set. In contrast to the informed approach, result in Figure 4e show the outcome of using uniform priors for all three parameters, and we see that this leads to a poorly-defined posterior with regions of non-zero posterior density that are biologically irrelevant.

|         | $\lambda$ (/h)      | $D$ ( $\mu\text{m}^2/\text{h}$ ) | $\delta$ (/h)          |
|---------|---------------------|----------------------------------|------------------------|
| Model 1 | 0.040 (0.038,0.042) | –                                | –                      |
| Model 2 | 0.040 (0.038,0.042) | 620 (480,800)                    | –                      |
| Model 3 | 0.040 (0.038,0.042) | 620 (480,800)                    | 0.0036 (0.0027,0.0046) |

**Table 1** Point estimates for each parameter, taken to be the posterior mode, or maximum likelihood estimate from the informed posterior distribution for each model. 95% credible intervals are estimated using the univariate marginal distributions and are shown in parentheses. All estimates are displayed to two significant figures.

Overall, comparing the informed posteriors in Figure 4a-c with the uninformed posteriors in Figure 4d-e we see the importance of the sequential approach. Given the full posterior distribution in Figure 4c we can integrate one of the components to form a series of three bivariate posterior distributions, as shown in Figure 5. Visually we see that  $D$  and  $\lambda$ , and  $\delta$  and  $\lambda$  are approximately uncorrelated, whereas  $\delta$  and  $D$  appear to be strongly negatively correlated. The Pearson correlation coefficients (Illowsky et al., 2015), given in Figure 5, confirm these visual observations.

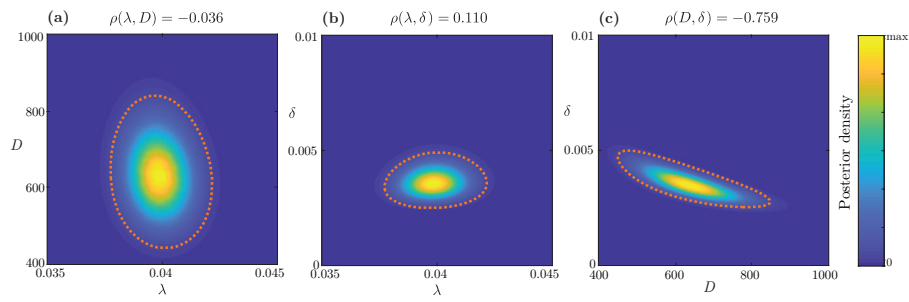

**Fig. 5 Informed bivariate marginal posterior distributions for model 3.** Bivariate marginal posterior distributions formed by integrating out  $\delta$ ,  $D$  and  $\lambda$  in (a), (b) and (c), respectively, using the informed posterior distribution in Figure 4e. The Pearson correlation coefficient,  $\rho(\cdot, \cdot)$ , is approximated using quadrature, and is shown, as indicated, for each marginal bivariate distribution. The 95% credible region for each bivariate marginal distribution is enclosed by the orange dashed lines.



In addition to visualising the posterior and marginal posterior distributions in Figure 4c and Figure 5, respectively, we can also calculate and compute the credible region shown in Figure 6.

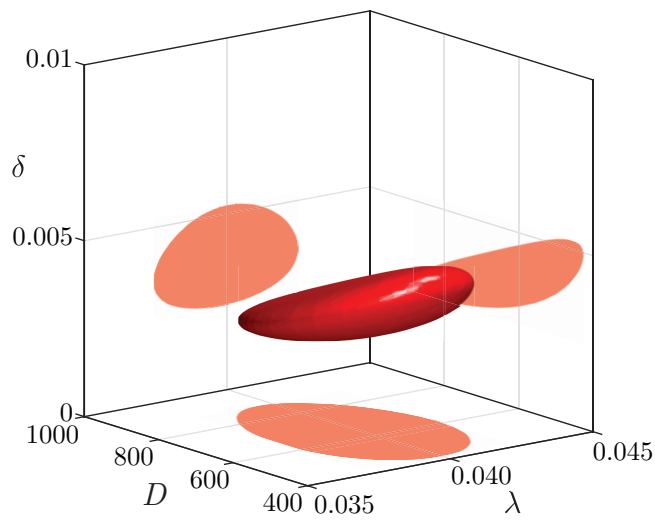

**Fig. 6 95% credible region for the model 3 posterior distribution.** Given experimental data from all experiment types, we are 95% confident that the parameter combination for model 3 lies within this region. Note that shadows on axis planes do not indicate marginal posterior distributions, but rather the profile of the 95% credible region, viewed perpendicular to the plane. Estimates of the three bivariate marginal posterior distributions are given in Figure 5.

Now that we have arrived at a well-defined posterior distribution for  $\Theta$ , we can sample from this distribution and evaluate all three models and compare the expected model solution, and variability across many samples of model solutions, with the experimental data. A summary of the experimental data and model predictions, including 95% prediction intervals, are shown in Figure 7a-c for the proliferation assay, circular barrier assay and the invasion assay. For the proliferation assay, the barrier assay, and the invasion assay we see that the expected model predictions passes through most of the experimental data points. Again, for all three experiments we see that the 95% prediction intervals encompass almost all of the experimental measurements, as we would expect. In addition to showing how the solution of Equation (4) predicts the position of the leading edge of the invading population,  $\min\{x : C(x, t) = 0\}$  in Figure 7c, we also show the full solution of Equation (4) in Figure 7d. Here we see the temporal evolution of both the melanoma density,  $C(x, t)$ , and the density of skin tissues,  $S(x, t)$ . These profiles show that the advance of the melanoma cell density profile in the positive  $x$  direction is closely associated with the retreat of the skin tissue profile, as expected. This coupling between the advance of the melanoma cells and the retreat of the skin tissues is evident in Figure 1i-l. In the solution of the mathematical model, the simultaneous migration and proliferation of melanoma cells, coupled with the retreat of the tissue, gives rise to an advancing front of melanoma cells that is illustrated in the space-time diagram in Figure 7e.

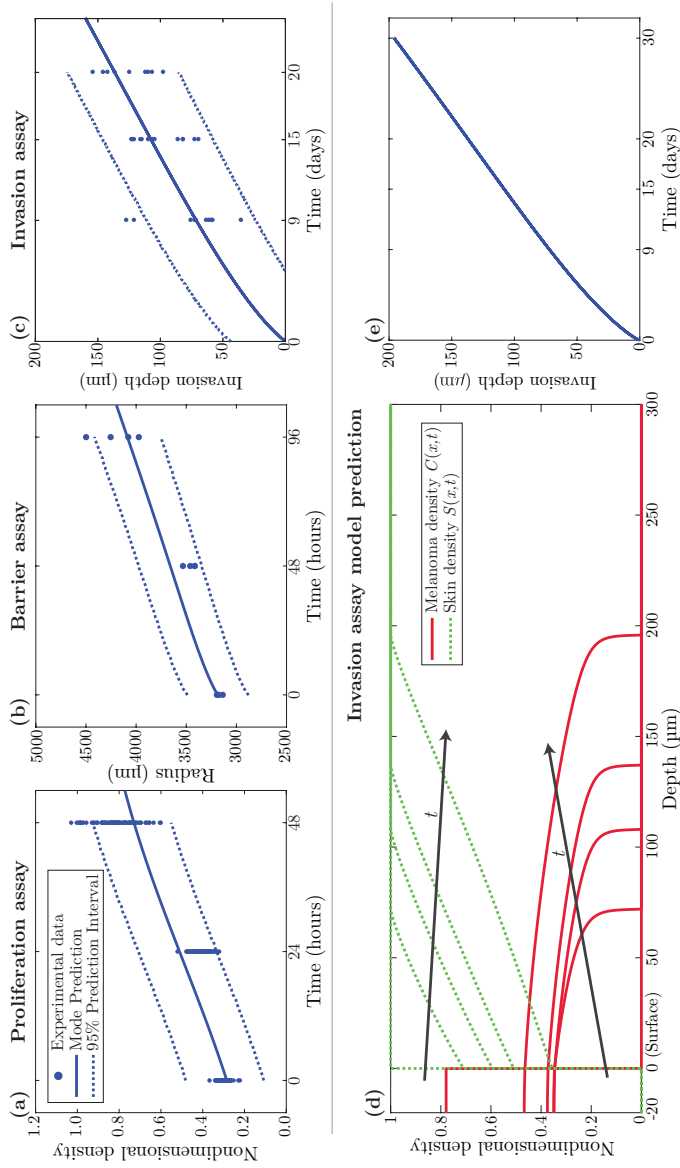

**Fig. 7 Experimental data and model predictions for all experiments.** Experimental data and model predictions shown for experiment type 1, 2 and 3 in (a)-(c), respectively. Solid blue lines indicate model predictions using the mode parameter combination. Dashed blue lines indicate approximate 95% prediction intervals. That is, the model predicts 95% of observations lie within this interval. (d) A detailed model prediction of the invasion assay using Equation (4) parameterised using the mode parameter combination. Density curves are shown as a function of depth for both simulated melanoma (red) and skin (blue) at times where experimental observations are taken,  $t = 9, 15$  and 20 days. Furthermore, an additional solution is shown at  $t = 30$  days, which is beyond the timescale of the experimental data. The location of the melanoma cell front, which is the smallest depth such that  $C(x,t) = 0$ , is visible in (d) since the  $C(x,t)$  profile is sharp-fronted. The position of the front is shown as a function of time in (e).

## 6 Conclusion and Outlook

Mathematical models of cell invasion involve coupled partial differential equations that describe how a population of cells degrades and simultaneously invades into some biological tissue. These models are well-established in the mathematical biology literature. The scientific importance of these models (Gatenby et al., 1996) and the mathematical analysis of these models (Perumpanani et al., 1999) are both well advanced. Yet, despite the significance of these models, there are no standard, well-accepted statistical protocols for calibrating these models using experimental data and/or experimental images.

In this work we present a Bayesian sequential learning approach, and demonstrate how it can be used to parameterise a simple model of cell invasion using data describing how a population of melanoma cells invades into human skin tissue. A key attraction of our approach is that we use images from a sequence of increasingly-sophisticated experiments. The measurements from each image are objective and straightforward, yet when these simple measures are combined sequentially, they allow us to parameterise the mathematical model to arrive at well-defined posterior distributions from which biologically-relevant parameter estimates can be taken. In contrast, taking a naive approach and simply estimating all parameters simultaneously from the images of the invasion assay leads to poorly-defined parameter estimates that, in this case, are biologically irrelevant.

While we have chosen to present our approach using a standard mathematical model of invasion in which we make fairly standard assumptions, it is possible to apply our approach to other types of models. For example, here we make the standard assumption that cells proliferate logistically in the invasion assay. However, if additional evidence suggested that a more general sigmoid growth model was appropriate (Browning et al., 2017; Sarapata et al., 2014), then our inference procedure could be applied to any other deterministic growth model. Similarly, we have used a non-linear

diffusion term in the invasion model so that the diffusivity of the melanoma cells is a linearly decreasing function of total density. Again, if there were some evidence that some other kind of decreasing function of total density was warranted (Cai et al., 2007), our procedure could be repeated using a slightly different model with a different functional form for the nonlinear diffusivity.

Our inference approach is novel from a statistical point of view as we make progress by sequentially estimating parameters in a sequence of related models. This approach requires very little prior knowledge of the parameters and leads to well-defined posterior distributions. Deterministic models of cell migration and cell invasion are often calibrated to match experimental data using maximum likelihood, least-squares approaches (Cai et al., 2007; Sengers et al., 2007; Bowden et al., 2014; Hormuth et al., 2017). Such approaches produce a best-fit parameter combination but do not provide a means of systematically incorporating experimental variability from a sequence of related, but distinct experiments. As a result, parameter estimates produced using standard maximum likelihood approaches across a sequence of increasingly sophisticated models may not make sense. Our approach enforces a sensible relationship between those parameters estimated in the simpler experiments and those parameters estimated using more sophisticated experiments. The importance of taking a sequential approach is demonstrated in our study as we show that attempting to estimate all three parameters in the mathematical model using images from the invasion assay, without applying informed prior knowledge, leads to a poorly defined posterior distribution that may produce biologically irrelevant parameter combinations.

In our study, we focus on a likelihood-based technique as we are able to specify our likelihood function. Approximate techniques for parameter inference, such as approximate Bayesian computation (ABC), are also widely used to calibrate mathematical models to match experimental data (Toni et al., 2009; Beaumont et al., 2002; Browning et al., 2018), and are a necessity with stochastic mathematical models

where the likelihood function is intractable. An extension of our study, that could include stochastic or individual based models, could apply such techniques such as ABC to our data set in a similar way. A key limitation of methods that rely on ABC is that they require a prior distribution to be fully specified before performing inference (Fearnhead et al., 2012). Another limitation is that ABC techniques typically require a large number of model realisations to produce a posterior distribution. While different variations of ABC have been developed to alleviate some of these limitations, such as Markov chain Monte Carlo sampling (Toni et al., 2009), sequential Monte Carlo sampling (Sisson et al., 2007), multilevel rejection sampling (Warne et al., 2018), and hierarchical ABC (Maclaren et al., 2017), our approach avoids some of these issues as we are able to directly specify the likelihood. For example, our application of a likelihood-based method enables the posterior density to be calculated numerically using a coarse discretisation of the parameter space using a relatively small number of deterministic model realisations. Such a coarse discretisation can be used to explore the posterior support, and the posterior distribution can be enhanced by refining the discretisation within the support, or by applying interpolation techniques. Finally, calculating the posterior distribution directly using a likelihood-based approach allows us to compute measures such as credible regions, and posterior mode estimates, without further data processing.

**Acknowledgements** This work is supported by the Australian Research Council (DP170100474). We appreciate helpful comments from David Warne.

## References

1. Anderson ARA, Quaranta V (2008) Integrative mathematical oncology. *Nat Rev Cancer*. 8:22734.
2. Beaumont MA, Zhang W, Balding DJ (2002) Approximate Bayesian computation in population genetics. *Genetics*. 162:2025-2035.
3. Bowden LG, Maini PK, Moulton DE, Tang JB, Wang XT, Liu PY, Byrne HM (2014) An ordinary differential equation model for full thickness wounds and the effects of diabetes. *J Theor Biol*. 361:87100.



4. Browning AP, McCue SW, Simpson MJ (2017) A Bayesian computational approach to explore the optimal duration of a cell proliferation assay. *Bull Math Biol.* 10:1888-1906.
5. Browning AP, McCue SW, Binny RN, Plank MJ, Shah ET, Simpson MJ (2018) Inferring parameters for a lattice-free model of cell migration and proliferation using experimental data. *J Theor Biol.* 437:251260.
6. Cai AQ, Landman KA, Hughes BD (2007) Multi-scale modeling of a wound-healing cell migration assay. *J Theor Biol.* 245:576-594.
7. Carey TE, Takahashi T, Resnick LA, Oettgen HF, Old LJ (1976) Cell surface antigens of human malignant melanoma: mixed hemadsorption assays for humoral immunity to cultured autologous melanoma cells. *PNAS.* 73:3278-3282.
8. Collis J, Connor AJ, Paczkowski M, Kannan P, Pitt-Francis J, Byrne HM, Hubbard ME (2017) Bayesian calibration, validation and uncertainty quantification for predictive modelling of tumour growth: a tutorial. *Bull Math Biol.* 79:939974.
9. Fasano A, Herrero MA, Rodrigo MR (2009) Slow and fast invasion waves in a model of acid-mediated tumour growth. *Math Biosci.* 220:45-56.
10. Fearnhead P, Prangle D (2012) Constructing summary statistics for approximate Bayesian computation: semi-automatic approximate Bayesian computation *J R Stat Soc B.* 74:419-474.
11. Gatenby RA, Gawlinski ET (1996) A reaction–diffusion model of cancer invasion. *Cancer Res.* 56:5745-5753.
12. Gelman A, Carlin JB, Stern HS, Rubin DB (2004) Bayesian data analysis. CRC Press, Florida.
13. Haridas P, Penington CJ, McGovern JA, McElwain DLS, Simpson MJ (2017a) Quantifying rates of cell migration and cell proliferation in co-culture barrier assays reveals how skin and melanoma cells interact during melanoma spreading and invasion. *J Theor Biol.* 423:13-25.
14. Haridas P, McGovern JA, McElwain DLS, Simpson MJ (2017b) Quantitative comparison of the spreading and invasion of radial growth phase and metastatic melanoma cells in a three-dimensional human skin equivalent model. *PeerJ.* 5:e3754.
15. Haridas P, Browning AP, McGovern JA, McElwain DLS, Simpson MJ (2018) Three-dimensional experiments and individual based simulations show that cell proliferation drives melanoma nest formation in human skin tissue. *bioRxiv.* <https://www.biorxiv.org/content/early/2017/12/21/238303>. Accessed: March 2018.
16. Hormuth DA II, Weis JA, Barnes SL, Miga MI, Rericha EC, Quaranta V, Yankeelo TE (2017) A mechanically coupled reactiondiffusion model that incorporates intra-tumoural heterogeneity to predict in vivoglioma growth. *J R Soc Interface.* 14:20161010.
17. Illowsky B, Dean S (2015) Introductory statistics. OpenStax College, Texas.
18. Landman KA, Pettet GJ (1998) Modelling the action of proteinase and inhibitor in tissue invasion. *Math Biosci.* 154:23-37.

19. Maclaren OJ, Parker A, Pin C, Carding SR, Watson AJM, Fletcher AG, Byrne HM, Maini PK (2017) A hierarchical bayesian model for understanding the spatiotemporal dynamics of the intestinal epithelium. *PLOS Comput Biol.* 13:1005688.
20. Maini PK, McElwain DLS, Leavesley DI (2004) Traveling wave model to interpret a wound-healing cell migration assay for human peritoneal mesothelial cells. *Tissue Engineering.* 10:475482.
21. Massey SC, Assanah MC, Lopez KA, Canoll P, Swanson KR (2012) Glial progenitor cell recruitment drives aggressive glioma growth: mathematical and experimental modelling. *J R Soc Interface.* 9:17571766.
22. Mathworks (2018a) Image processing toolbox. <https://au.mathworks.com/products/image.html>. Accessed: March 2018.
23. Mathworks (2018b) Gridded and scattered data interpolation, data gridding, piecewise polynomials. <https://au.mathworks.com/help/matlab/interpolation.html>. Accessed: March 2018.
24. Mathworks (2018c) Kernel smoothing function estimate for univariate and bivariate data. <http://www.mathworks.com/help/stats/ksdensity.html>. Accessed: March 2018.
25. Perumpanani A, Sherratt JA, Norbury J, Byrne HM (1999) A two parameter family of travelling waves with a singular barrier arising from the modelling of extracellular matrix mediated cellular invasion. *Physica D.* 126:145-159.
26. Sarapata EA, de Pillis LG (2014) A comparison and catalog of intrinsic tumor growth models. *Bull Math Biol.* 76:2010-2024.
27. Sengers BG, Please CP, Oreffo ROC (2007) Experimental characterization and computational modelling of two-dimensional cell spreading for skeletal regeneration. *J R Soc Interface.* 4:1107-1117.
28. Sisson SA, Fan Y, Tanaka MM (2007) Sequential Monte Carlo without likelihoods. *PNAS.* 104:1760-1765.
29. Smallbone K, Gavaghan DJ, Gatenby RA, Maini PK (2005) The role of acidity in solid tumour growth and invasion. *J Theor Biol.* 235: 476-484.
30. Swanson KR, Rockne RC, Claridge J, Chaplain MA, Alvord EC, Anderson ARA (2011) Quantifying the role of angiogenesis in malignant progression of gliomas: in silico modeling integrates imaging and histology. *Cancer Res.* 71:73667375.
31. Toni T, Welch D, Strelkowa N, Ipsen A, Stumpf MPH (2009) Approximate Bayesian computation scheme for parameter inference and model selection in dynamical systems. *J Royal Soc Interface.* 6:187-202.
32. Treloar KK, Simpson MJ, Haridas P, Manton KJ, Leavesley DI, McElwain DLS, Baker RE (2013a) Multiple types of data are required to identify the mechanisms influencing the spatial expansion of melanoma cell colonies. *BMC Syst Biol.* 7:137.
33. Treloar KK, Simpson MJ (2013b) Sensitivity of edge detection methods for quantifying cell migration assays. *PLOS One.* 8:e67389.

34. Warne DJ, Baker RE, Simpson MJ (2017) Optimal quantification of contact inhibition in cell populations. *Biophys J*. 113:1920-1924.
35. Warne DJ, Baker RE, Simpson MJ (2018) Multilevel rejection sampling for approximate Bayesian computation. *Comput Stat Data An*. <https://doi.org/10.1016/j.csda.2018.02.009>
